# Supplementary material
Source: PubMed Central journal article supplement (PMC4596662)
Supplement: supp_115.176735_176735SI.pdf [file supp_115.176735_176735SI.pdf]

## **Supporting Information inventory**

**Table S1** Simulated TRB with 0.1%, 0.5% and 2% sequencing error.

**Table S2** Simulated IGH with 0.1%, 0.5% and 2% sequencing error and 0.1% hyper-mutation

**Table S3** Simulated Data with 0.5% sequencing error (TRA/IGK/IGL) and 4% hyper-mutation

**Table S4** Plasmid mixing pattern

**Table S5** Data process for PCR and sequencing error statistics

**Table S6** Samples information

**Table S7** Experimental design for five CD4+ T cell clones in the three spiked in mix

**Table S8** Performance of IMonitor and other tools on the simulated dataset

**Table S9** TRB and IGH V/J primers

**Figure S1** Insertion and deletion length distribution for simulated data

**Figure S2** IGH-VDJ Mutation and deletion/insertion analysis on the public sequences

**Figure S3** Outputs of IMonitor, H-B-01 as an example

**Figure S4** H-B-01 sample output figure of IMonitor

**Figure S5** Error characteristics of 6 plasmid mix samples

**Figure S6** V-J pairing dynamics for M002

**Figure S7** MiTCR and IMonitor performance in 3 spiked-in samples

**Figure S8** Nucleotide composition of V/J genes

**Table S1. Simulated TRB with 0.1%, 0.5% and 2% sequencing error.**

| <b>Mismatch Rate</b> | <b>Hyper-Mutation Rate</b> | <b>Software</b>     | <b>TRBV-Gene(%)</b> | <b>TRBD-Gene(%)</b> | <b>TRBJ-Gene(%)</b> | <b>TRBV-allele(%)</b> | <b>TRBD-allele(%)</b> | <b>TRBJ-allele(%)</b> |
|----------------------|----------------------------|---------------------|---------------------|---------------------|---------------------|-----------------------|-----------------------|-----------------------|
| 0.10%                | 0.00%                      | <b>IMMonitor</b>    | 98.25               | 77.04               | 100.00              | 82.95                 | 72.13                 | 99.98                 |
|                      |                            | <b>HighV-QUEST</b>  | 91.46               | 86.31               | 99.24               | 65.94                 | 81.69                 | 99.23                 |
|                      |                            | <b>IgBLAST</b>      | 97.87               | 80.55               | 99.20               | 72.46                 | 76.33                 | 99.19                 |
|                      |                            | <b>Decombinator</b> | 70.28               | -                   | 80.76               | 29.53                 | -                     | 70.17                 |
| 0.50%                | 0.00%                      | <b>IMMonitor</b>    | 98.18               | 76.90               | 100.00              | 82.34                 | 71.60                 | 99.83                 |
|                      |                            | <b>HighV-QUEST</b>  | 91.44               | 85.77               | 99.24               | 66.04                 | 80.75                 | 99.14                 |
|                      |                            | <b>IgBLAST</b>      | 97.80               | 79.32               | 99.02               | 72.58                 | 74.95                 | 98.92                 |
|                      |                            | <b>Decombinator</b> | 68.33               | -                   | 78.64               | -                     | -                     | -                     |
| 2%                   | 0.00%                      | <b>IMMonitor</b>    | 98.13               | 77.82               | 100.00              | 80.01                 | 70.77                 | 99.42                 |
|                      |                            | <b>HighV-QUEST</b>  | 91.59               | 83.89               | 99.30               | 65.39                 | 77.27                 | 98.96                 |
|                      |                            | <b>IgBLAST</b>      | 97.83               | 75.13               | 98.61               | 71.82                 | 70.07                 | 98.27                 |
|                      |                            | <b>Decombinator</b> | 59.58               | -                   | 68.45               | 24.85                 | -                     | 60.18                 |

**Table S2. Simulated IGH with 0.1%, 0.5% and 2% sequencing error and 0.1%**

**hyper-mutation**

| <b>Mismatch Rate</b> | <b>Hyper-Mutation Rate</b> | <b>Software</b>    | <b>IGHV-G ene(%)</b> | <b>IGHD-G ene(%)</b> | <b>IGHJ-G ene(%)</b> | <b>IGHV-al lele(%)</b> | <b>IGHD-al lele(%)</b> | <b>IGHJ-all ele(%)</b> |
|----------------------|----------------------------|--------------------|----------------------|----------------------|----------------------|------------------------|------------------------|------------------------|
| <b>0.10%</b>         | 0.10%                      | <b>IMonitor</b>    | 98.30                | 83.97                | 99.98                | 81.48                  | 81.41                  | 99.88                  |
|                      |                            | <b>HighV-QUEST</b> | 87.97                | 72.90                | 98.60                | 69.38                  | 70.81                  | 97.21                  |
|                      |                            | <b>IgBLAST</b>     | 98.76                | 75.68                | 99.83                | 80.74                  | 73.7                   | 99.73                  |
| <b>0.50%</b>         | 0.10%                      | <b>IMonitor</b>    | 98.19                | 83.86                | 99.98                | 81.3                   | 81.28                  | 99.66                  |
|                      |                            | <b>HighV-QUEST</b> | 87.51                | 72.73                | 98.61                | 68.96                  | 70.66                  | 97.01                  |
|                      |                            | <b>IgBLAST</b>     | 98.63                | 75.47                | 99.83                | 80.63                  | 73.52                  | 99.5                   |
| <b>2%</b>            | 0.10%                      | <b>IMonitor</b>    | 98.02                | 83.79                | 99.96                | 80.46                  | 81.01                  | 98.68                  |
|                      |                            | <b>HighV-QUEST</b> | 87.72                | 72.33                | 98.59                | 68.43                  | 70.04                  | 96.17                  |
|                      |                            | <b>IgBLAST</b>     | 98.52                | 74.61                | 99.79                | 79.63                  | 72.22                  | 98.55                  |

**Table S3. Simulated Data with 0.5% sequencing error (TRA/IGK/IGL) and 4% hyper-mutation for IGK/IGL**

| Gene       | Mismatch Rate | Hyper-Mutation Rate | Software            | V-Gene(%) | J-Gene(%) | V-allele(%) | J-allele(%) |
|------------|---------------|---------------------|---------------------|-----------|-----------|-------------|-------------|
| <b>IGK</b> | 0.50%         | 4.00%               | <b>IMMonitor</b>    | 93.57     | 99.99     | 86.91       | 92.70       |
|            |               |                     | <b>HighV-QUST</b>   | 73.13     | 99.97     | 64.94       | 93.19       |
|            |               |                     | <b>IgBLAST</b>      | 91.53     | 100.00    | 85.46       | 92.94       |
| <b>IGL</b> | 0.50%         | 4.00%               | <b>IMMonitor</b>    | 100.00    | 99.57     | 77.24       | 98.79       |
|            |               |                     | <b>HighV-QUST</b>   | 98.82     | 97.54     | 76.85       | 97.26       |
|            |               |                     | <b>IgBLAST</b>      | 100.00    | 99.67     | 78.25       | 99.53       |
| <b>TRA</b> | 0.50%         | 0.00%               | <b>IMMonitor</b>    | 98.35     | 100.00    | 86.75       | 99.39       |
|            |               |                     | <b>HighV-QUST</b>   | 100.00    | 94.12     | 83.31       | 93.85       |
|            |               |                     | <b>IgBLAST</b>      | 100.00    | 100.00    | 85.32       | 99.93       |
|            |               |                     | <b>Decombinator</b> | 68.36     | 72.83     | -           | -           |

**Table S4. Plasmid mixing pattern**

| Plasmid No. | V gene          | J gene  | Plasmid mix 1-1* | Plasmid mix 1-2* | Plasmid mix 2-1* | Plasmid mix 2-2* | Plasmid mix 3-1* | Plasmid mix 3-2* |
|-------------|-----------------|---------|------------------|------------------|------------------|------------------|------------------|------------------|
| C-01        | TRBV10-1        | TRBJ2-7 | 2000             | 2000             | 10               | 10               | 100000           | 100000           |
| C-02        | TRBV10-2/3      | TRBJ2-7 | 2000             | 2000             | 1000             | 1000             | 1000             | 1000             |
| C-03        | TRBV11-1/2/3    | TRBJ1-3 | 2000             | 2000             | 10               | 10               | 100000           | 100000           |
| C-04        | TRBV11-1/2/3    | TRBJ1-5 | 2000             | 2000             | 100              | 100              | 10000            | 10000            |
| C-05        | TRBV12-3/4      | TRBJ2-1 | 2000             | 2000             | 10000            | 10000            | 100              | 100              |
| C-06        | TRBV12-5        | TRBJ2-1 | 2000             | 2000             | 100              | 100              | 10000            | 10000            |
| C-07        | TRBV13          | TRBJ1-1 | 2000             | 2000             | 10000            | 10000            | 100              | 100              |
| C-08        | TRBV14          | TRBJ2-7 | 2000             | 2000             | 100000           | 100000           | 10               | 10               |
| C-09        | TRBV15          | TRBJ1-6 | 2000             | 2000             | 1000             | 1000             | 1000             | 1000             |
| C-10        | TRBV15          | TRBJ2-4 | 2000             | 2000             | 100000           | 100000           | 10               | 10               |
| C-11        | TRBV16          | TRBJ1-1 | 2000             | 2000             | 100000           | 100000           | 10               | 10               |
| C-12        | TRBV19          | TRBJ1-6 | 2000             | 2000             | 100              | 100              | 10000            | 10000            |
| C-13        | TRBV20-1        | TRBJ1-4 | 2000             | 2000             | 100000           | 100000           | 10               | 10               |
| C-14        | TRBV20-1        | TRBJ1-5 | 2000             | 2000             | 10               | 10               | 100000           | 100000           |
| C-15        | TRBV20-1        | TRBJ2-2 | 2000             | 2000             | 1000             | 1000             | 1000             | 1000             |
| C-16        | TRBV24-1        | TRBJ1-2 | 2000             | 2000             | 100              | 100              | 10000            | 10000            |
| C-17        | TRBV25          | TRBJ2-5 | 2000             | 2000             | 10000            | 10000            | 100              | 100              |
| C-18        | TRBV27/28       | TRBJ2-4 | 2000             | 2000             | 100000           | 100000           | 10               | 10               |
| C-19        | TRBV29-1        | TRBJ2-3 | 2000             | 2000             | 100000           | 100000           | 10               | 10               |
| C-20        | TRBV2           | TRBJ2-6 | 2000             | 2000             | 10               | 10               | 100000           | 100000           |
| C-21        | TRBV30          | TRBJ1-1 | 2000             | 2000             | 1000             | 1000             | 1000             | 1000             |
| C-22        | TRBV3-1         | TRBJ1-2 | 2000             | 2000             | 10000            | 10000            | 100              | 100              |
| C-23        | TRBV4-1/2/3     | TRBJ2-7 | 2000             | 2000             | 10000            | 10000            | 100              | 100              |
| C-24        | TRBV5-1         | TRBJ2-1 | 2000             | 2000             | 100000           | 100000           | 10               | 10               |
| C-25        | TRBV5-4/5/6/8   | TRBJ2-3 | 2000             | 2000             | 10000            | 10000            | 100              | 100              |
| C-26        | TRBV6-1/2/3/5/8 | TRBJ2-1 | 2000             | 2000             | 10000            | 10000            | 100              | 100              |
| C-27        | TRBV6-4         | TRBJ2-5 | 2000             | 2000             | 1000             | 1000             | 1000             | 1000             |
| C-28        | TRBV6-6         | TRBJ1-6 | 2000             | 2000             | 10               | 10               | 100000           | 100000           |
| C-29        | TRBV6-9         | TRBJ1-3 | 2000             | 2000             | 1000             | 1000             | 1000             | 1000             |
| C-30        | TRBV7-2/4/6/7/8 | TRBJ2-6 | 2000             | 2000             | 10               | 10               | 100000           | 100000           |
| C-31        | TRBV7-3         | TRBJ2-7 | 2000             | 2000             | 100              | 100              | 10000            | 10000            |
| C-32        | TRBV7-9         | TRBJ1-4 | 2000             | 2000             | 1000             | 1000             | 1000             | 1000             |
| C-33        | TRBV9           | TRBJ1-2 | 2000             | 2000             | 100              | 100              | 10000            | 10000            |

Note: \* the clone ratio in the sample.

**Table S5. Data process for PCR and sequencing error statistics.**

| Sample          | Sum Sequence | High Quality Sequence(%) | Filter Sequence(%) | Low Quality Corrected(%) | PCR Error Corrected(%) | Effective Data | Before Correction |                   | After Correction |                   |
|-----------------|--------------|--------------------------|--------------------|--------------------------|------------------------|----------------|-------------------|-------------------|------------------|-------------------|
|                 |              |                          |                    |                          |                        |                | Base Error(%)     | Sequence Error(%) | Base Error(%)    | Sequence Error(%) |
| <b>index-1</b>  | 4,273,571    | 78.50                    | 9.28               | 12.21                    | 8.36                   | 3,876,775      | 0.098             | 7.304             | 0.016            | 1.152             |
| <b>index-2</b>  | 4,217,557    | 78.59                    | 9.77               | 11.64                    | 9.10                   | 3,805,551      | 0.111             | 8.628             | 0.022            | 1.564             |
| <b>index-3</b>  | 3,603,556    | 70.16                    | 16.25              | 13.59                    | 4.44                   | 3,018,100      | 0.070             | 5.218             | 0.009            | 0.590             |
| <b>index-10</b> | 5,078,119    | 81.28                    | 8.80               | 9.92                     | 4.70                   | 4,631,376      | 0.058             | 4.359             | 0.009            | 0.569             |
| <b>index-11</b> | 2,785,059    | 64.59                    | 18.61              | 16.80                    | 5.32                   | 2,266,836      | 0.081             | 6.484             | 0.010            | 0.779             |
| <b>index-12</b> | 3,335,881    | 76.15                    | 10.87              | 12.98                    | 6.04                   | 2,973,382      | 0.072             | 5.885             | 0.010            | 0.816             |

**Table S6. Samples information**

| <b>Sample</b> | <b>species</b> | <b>Gene</b> | <b>Library</b> | <b>Experimental method</b> | <b>Sequencer</b> | <b>Type</b> | <b>Amount</b> |
|---------------|----------------|-------------|----------------|----------------------------|------------------|-------------|---------------|
| <b>H-B-01</b> | Human          | TRB         | cDNA           | MPCR                       | Hiseq2500        | PE100       | 1ug           |
| <b>H-H-01</b> | Human          | IGH         | DNA            | MPCR                       | Hiseq2000        | PE100       | 3ug           |
| <b>M001</b>   | Human          | IGH         | DNA            | MPCR                       | Hiseq2500        | PE150       | 1.2ug         |
| <b>M002</b>   | Human          | IGH         | DNA            | MPCR                       | Hiseq2500        | PE150       | 1.2ug         |

**Table S7. Experimental design for five CD4+ T cell clones in the three spiked in mix.**

| Clone | TCRB V | TCRB J  | CDR3            | Mix 1   | Mix 2 | Mix 3   |
|-------|--------|---------|-----------------|---------|-------|---------|
| G     | VB8    | TRBJ1-1 | CASSLGGQGVG     | 100,000 | 1000  | 10      |
| A     | VB5.1  | TRBJ2-5 | CASSPGIAELKETQY | 10,000  | 1000  | 100     |
| B     | VB6.7  | TRBJ2-7 | CASHTGFVSYEQY   | 1000    | 1000  | 1000    |
| C     | VB4    | TRBJ1-4 | CSVGTGDNEKLF    | 100     | 1000  | 10,000  |
| D     | VB4    | TRBJ1-4 | CSVGQGDNEKLF    | 10      | 1000  | 100,000 |



**Table S8. Performance of IMonitor and other tools on the simulated dataset.**

|                                     | <b>Peak Memory(MB)</b> | <b>Run Time</b> |
|-------------------------------------|------------------------|-----------------|
| Data set of TRB( $10^5$ sequences)  |                        |                 |
| <b>IMonitor</b> <sup>a</sup>        | 325.88M                | 12m52s          |
| <b>IgBLAST</b> <sup>b</sup>         | 327.95M                | 27m46s          |
| <b>Decombinator</b> <sup>c</sup>    | 209.00M                | 1m23s           |
| <b>HighV-QUST</b> <sup>d</sup>      | -                      | -               |
| Data set of IGH ( $10^5$ sequences) |                        |                 |
| <b>IMonitor</b> <sup>a</sup>        | 226.22M                | 21m96s          |
| <b>IgBLAST</b> <sup>b</sup>         | 196.22M                | 92m30s          |
| <b>HighV-QUST</b> <sup>d</sup>      | -                      | -               |

Note: <sup>a</sup>, run with 1cpu and blast (-a 1); <sup>b</sup>, run with 1cpu and iglast (-num\_threads 1);

<sup>c</sup>, run with command prompt; <sup>d</sup>, run online, send the results to user after 1-2weeks

**Table S9. TRB and IGH V/J primers**

| IGH V/J Primers |                            | TRB V Primers    |                            |
|-----------------|----------------------------|------------------|----------------------------|
| IGHV1-18        | AGAGTCACCATGACCACAGAC      | TRBV2            | ATTTCACTCTGAAGATCCGGTCCAC  |
| IGHV1-2/1-46    | AGAGTCACCAKKACCAGGGAC      | TRBV3-1          | AAACAGTTCCAAATCGMTTCTCAC   |
| IGHV1-24        | AGAGTCACCATGACCGAGGAC      | TRBV4-1/2/3      | CAAGTCGCTTCTCACCTGAATG     |
| IGHV1-3/1-45    | AGAGTCACCATTACYAGGGAC      | TRBV5-1          | GCCAGTTCTCTAACTCTCGCTCT    |
| IGHV1-69/1-f    | AGAGTCACGATWACCRCGGAC      | TRBV5-4/5/6/8    | TCAGGTCGCCAGTTCCTAAATAT    |
| IGHV1-8         | AGAGTCACCATGACCAGGAAC      | TRBV6-4.1        | CACGTTGGCGTCTGCTGTACCCT    |
| IGH2-70/26/5    | ACCAGGCTCACCATYWCCAAGG     | TRBV6-8/5/1.2    | CAGGCTGGTGTCGGCTGCTCCCT    |
| IGHV3           | GGCCGATTACCATCTCMAG        | TRBV6-9/7/1.1/6  | CAGGCTGGAGTCAGCTGCTCCCT    |
| IGH4            | CGAGTCACCATRCMGTAGAC       | TRBV6-4.2        | AGTCGCTTGTGTACCCTCTCAG     |
| IGHV5-51        | CAGCCGACAAGTCCATCAGC       | TRBV6-2/3        | GGGGTTGGAGTCGGCTGCTCCCT    |
| IGHV6-1         | AGTCGAATAACCATCAACCCAG     | TRBV7-2/4/6/7/8  | GGGATCCGTCTCCACTCTGAMGAT   |
| IGHV7           | GACGGTTTGTCTTCTCCTTG       | TRBV7-3          | GGGATCCGTCTCTACTCTGAAGAT   |
| IGHJ            | CTGAGGAGACGGTGACCRKKG      | TRBV7-9          | GGGATCTTTCTCCACCTTGGAGAT   |
|                 |                            | TRBV9            | CCTGACTTGCCTCTGAACTAAACCT  |
|                 |                            | TRBV10-1         | CCTCACTCTGGAGTCTGCTGCC     |
|                 |                            | TRBV10-2/3       | CCTCACTCTGGAGTCMGCTACC     |
|                 |                            | TRBV11-1/2/3     | GCAGAGAGGCTCAAAGGAGTAGACT  |
|                 |                            | TRBV12-3.2/5.2   | GAAGGTGCAGCCTGCAGAACCCAG   |
|                 |                            | TRBV12-3.1/4/5.1 | GAAGATCCAGCCCTCAGAACCCAG   |
| TRB J Primers   |                            |                  |                            |
| TRBJ1.1         | CTTACCTACAACCTGTGAGTCTGGTG | TRBV13           | TCGATTCTCAGCTCAACAGTTC     |
| TRBJ1.2         | CTTACCTACAACGGTTAACCTGGTC  | TRBV14           | GGAGGGACGTATTCTACTCTGAAGG  |
| TRBJ1.3         | CTTACCTACAACAGTGAGCCAACCTT | TRBV15           | TTCTTGACATCCGCTCACCAGG     |
| TRBJ1.4         | AAGACAGAGAGCTGGGTTCCACT    | TRBV16           | CTGTAGCCTTGAGATCCAGGCTACGA |
| TRBJ1.5         | CTTACCTAGGATGGAGAGTCGAGTC  | TRBV18           | TAGATGAGTCAGGAATGCCAAAG    |
| TRBJ1.6         | CATACCTGTCACAGTGAGCCTG     | TRBV19           | TCCTTTCTCTACTGTGACATCGG    |
| TRBJ2.1         | CCTTCTTACCTAGCACGGTGA      | TRBV20-1         | AACCATGCAAGCCTGACCTT       |
| TRBJ2.2         | CTTACCCAGTACGGTCAGCCT      | TRBV24-1         | CTCCCTGTCCCTAGAGTCTGCCAT   |
| TRBJ2.3         | CCGCTTACCGAGCACTGTCAG      | TRBV25-1         | GCCCTCACATACCTCTCAGTACCTC  |
| TRBJ2.4         | AGCACTGAGAGCCGGGTCC        | TRBV27-1         | GATCCTGGAGTCGCCCAGC        |
| TRBJ2.5         | CGAGCACCAGGAGCCGCGT        | TRBV28           | ATTCTGGAGTCCGCCAGC         |
| TRBJ2.6         | CTCGCCCAGCACGGTCAGCCT      | TRBV29-1         | AACTCTGACTGTGAGCAACATGAG   |
| TRBJ2.7         | CTTACCTGTGACCGTGAGCCTG     | TRBV30-F5        | CAGATCAGCTCTGAGGTGCCCA     |

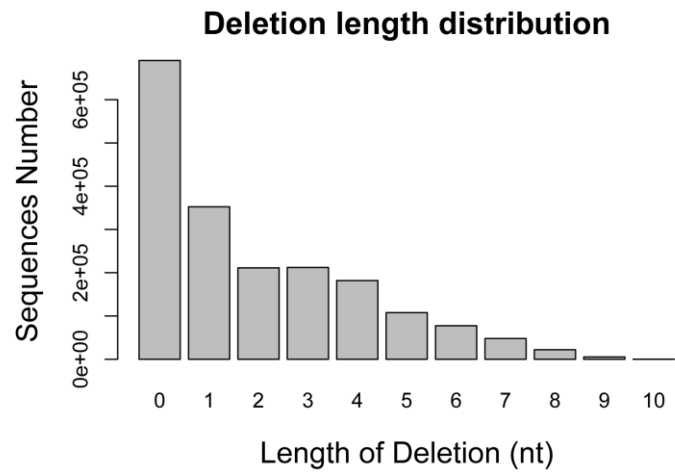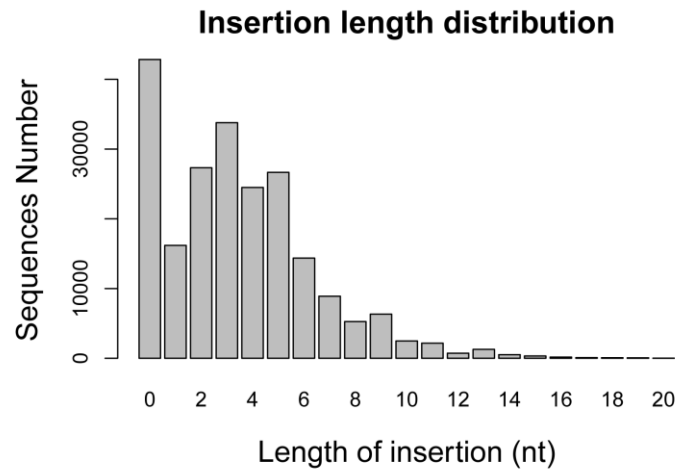

**Figure S1. Insertion and deletion length distribution for simulated data.**

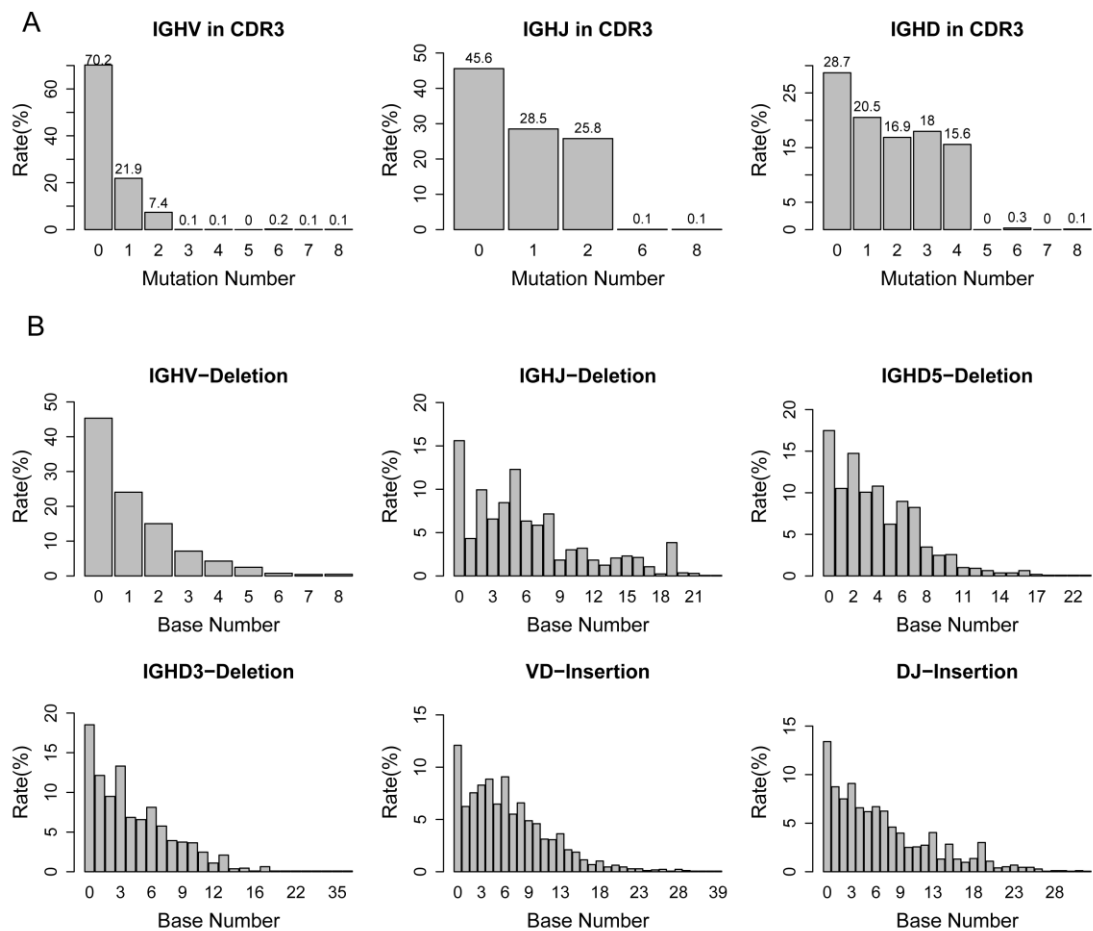

**Figure S2. IGH-VDJ Mutation and deletion/insertion analysis on the public sequences. (A) VDJ mutation number statistics. (B) VDJ deletion/insertion length statistics.** The data sets were obtained from IMGT/LIGM-DB database(<http://www.imgt.org/ligmdb/>), searched by “Homo sapiens”, “rearranged”, ”TRB” or “IGH”, and then selected the sequences annotated by manual(Annot. level==”manual”) and annotated by V,D,J genes. So these sequences have fairly high level of annotation confidence.

## 1. Sample Basical Statistics

| #Title                  | Seq_num | Rate_of_input(%) | Rate_of_rawdata(%) |
|-------------------------|---------|------------------|--------------------|
| Raw_seq_number(PE=1)    | 8126815 | -                | -                  |
| Clean_data              | 7955514 | 97.89            | 97.89              |
| PE_read_merged          | 7934499 | 99.74            | 97.63              |
| Merged_with_highquality | 7806823 | 98.13            | 96.06              |
| V_alignment             | 7692062 | 98.53            | 94.65              |
| D_alignment             | 3944006 | 50.52            | 48.53              |
| J_alignment             | 7509383 | 96.19            | 92.40              |
| VJ_alignment            | 7419604 | 95.04            | 91.29              |
| CDR3_found_VJ           | 7313503 | 98.57            | 89.99              |
| CDR3_found_byconserve   | -       | -                | -                  |
| PCR_Sequencing_correct  | 6569719 | 89.83            | 80.84              |
| Effective_data          | 6188283 | 94.19            | 76.14              |

-----Note:-----

Clean\_data: filter the Adapter pollution, low quality sequence  
Effective\_data: filter the sequence: 1. cannot find CDR3;  
2. V and J strand conflict; 3. CDR3 less than 0bp;  
4. sequence abundance filter.

## 2. Sample Further Statistics

|                                     |         |           |
|-------------------------------------|---------|-----------|
| in-frame:                           | 5986614 | 96.74     |
| out-of-frame(stop_codon):           | 33909   | 0.55      |
| out-of-frame(CDR3_length):          | 105860  | 1.71      |
| non-function:                       | 61899   | 1.00      |
| V_gene_used:                        | 48      | 100.00    |
| J_gene_used:                        | 13      | 100.00    |
| V-J_pairing:                        | 558     | 89.42     |
| Uniq_number(seq_nt,seq_aa):         | 1152945 | 926184    |
| Uniq_number(cdr3_nt,cdr3_aa):       | 204878  | 182609    |
| Shannon_index(seq,seq_aa):          | 16.23   | 15.74     |
| Shannon_index(cdr3_nt,cdr3_aa):     | 14.47   | 14.25     |
| Shanono_index(V,J,V-J):             | 3.84    | 2.54 6.22 |
| Hyper-mutation(base_rate,seq_rate): | 0.00    | 0.00      |

**Figure S3. Outputs of IMonitor, H-B-01 as an example.** Sample basic statistics show the data procedure, from raw data to effective data, such as paired-end reads merged, V(D)J alignment rate. Sample further statistics, show the multiple statistics based on effective data.

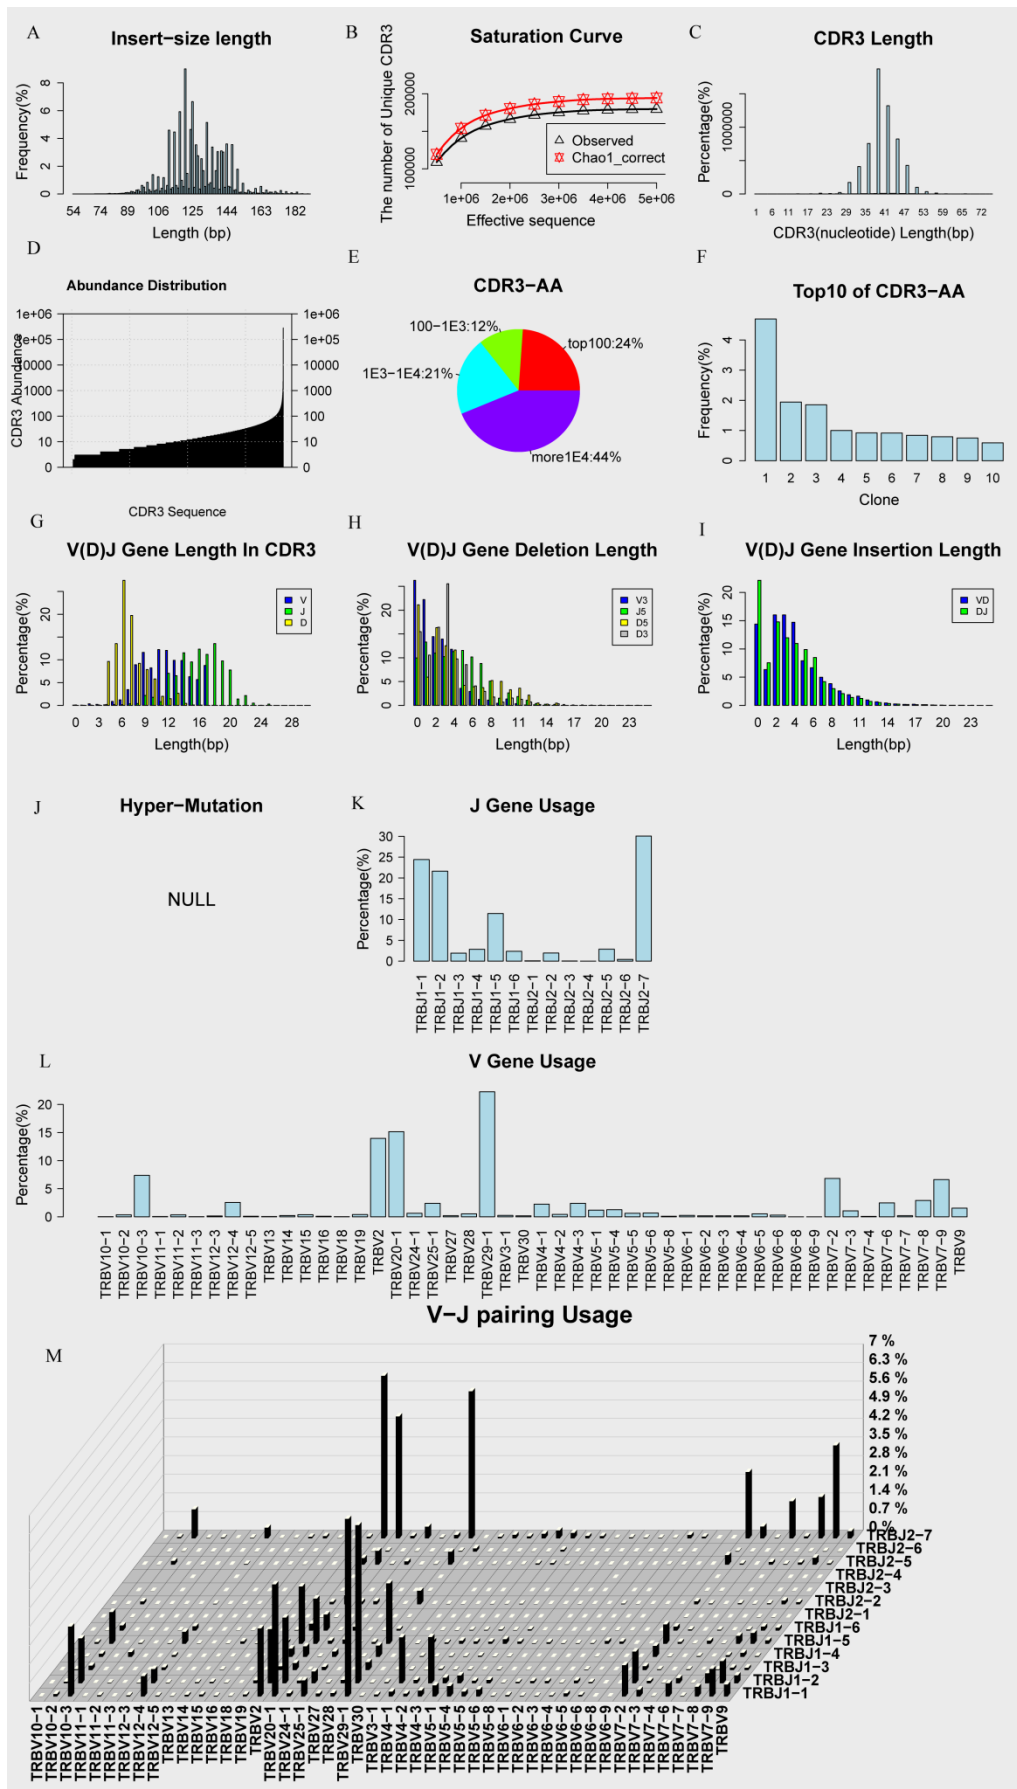

**Figure S4. H-B-01 sample output figure of IMonitor.** (A) Sequence length distribution. (B) Saturation curve, rarefaction studies of sequences. Sub-sequences are randomly selected and observed unique CDR3 number and predicted CDR3 number (Chao1 corrected algorithm) are calculated. (C) CDR3 nucleotide length distribution. (D) CDR3 abundance distribution. (E) CDR3 amino acid frequencies sectional content. (F) Top ten frequency of CDR3 amino acid. (G) Length distribution of V/D/J gene in CDR3 region. (H) Deletion length distribution of V/D/J gene. (I) Insertion length distribution of between V and D gene, D and J gene. (J) Hyper-mutation, Only for Ig. (K), J gene usage. (L) V gene usage. (M) Three-dimensional graph of V-J pairing.

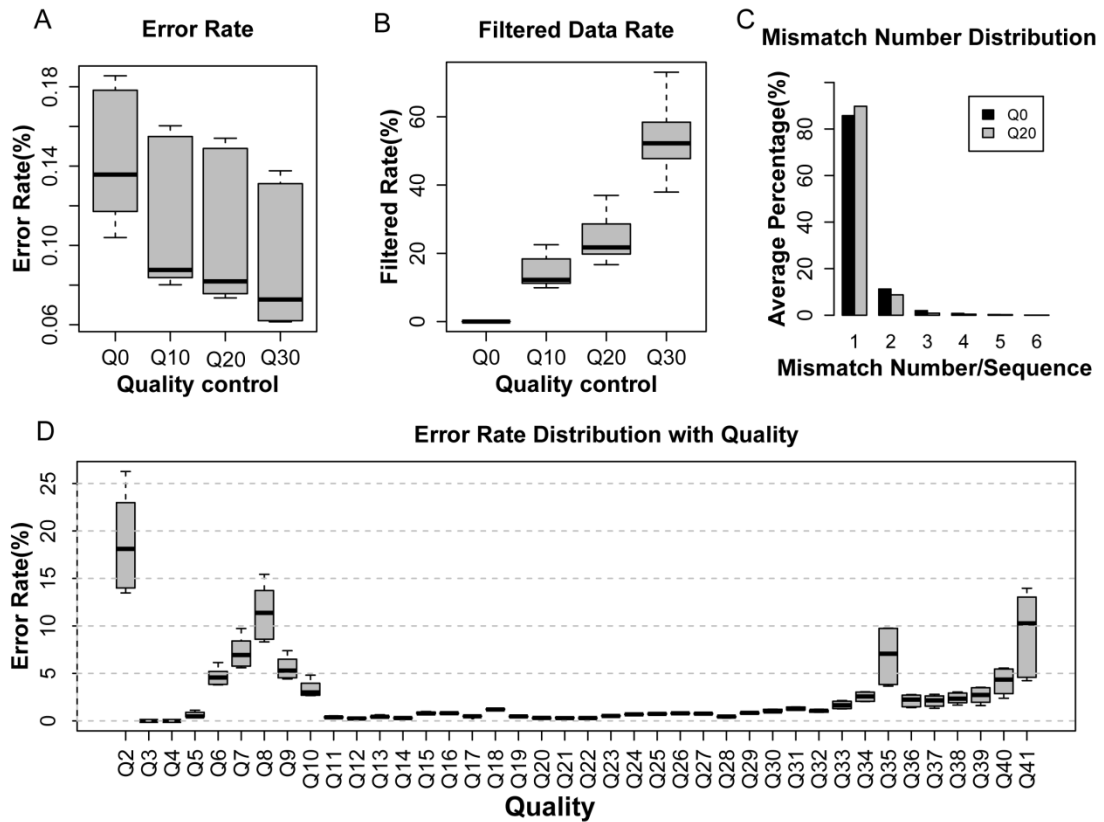

**Figure S5. Error characteristics of 6 plasmid mix samples.** (A) Error base rate after sequence filtering by different minimal quality value. For example, Q20 means filter the sequence with at least one base quality less than Q20. (B) Removed data rate after sequence filtering by different minimal quality. (C) Mismatch number distribution, raw sequences (Q0, no filtration) and sequences after filtering by minimal quality 20(Q20). (D) Error base distribution with base quality. Only unique sequences are considered.



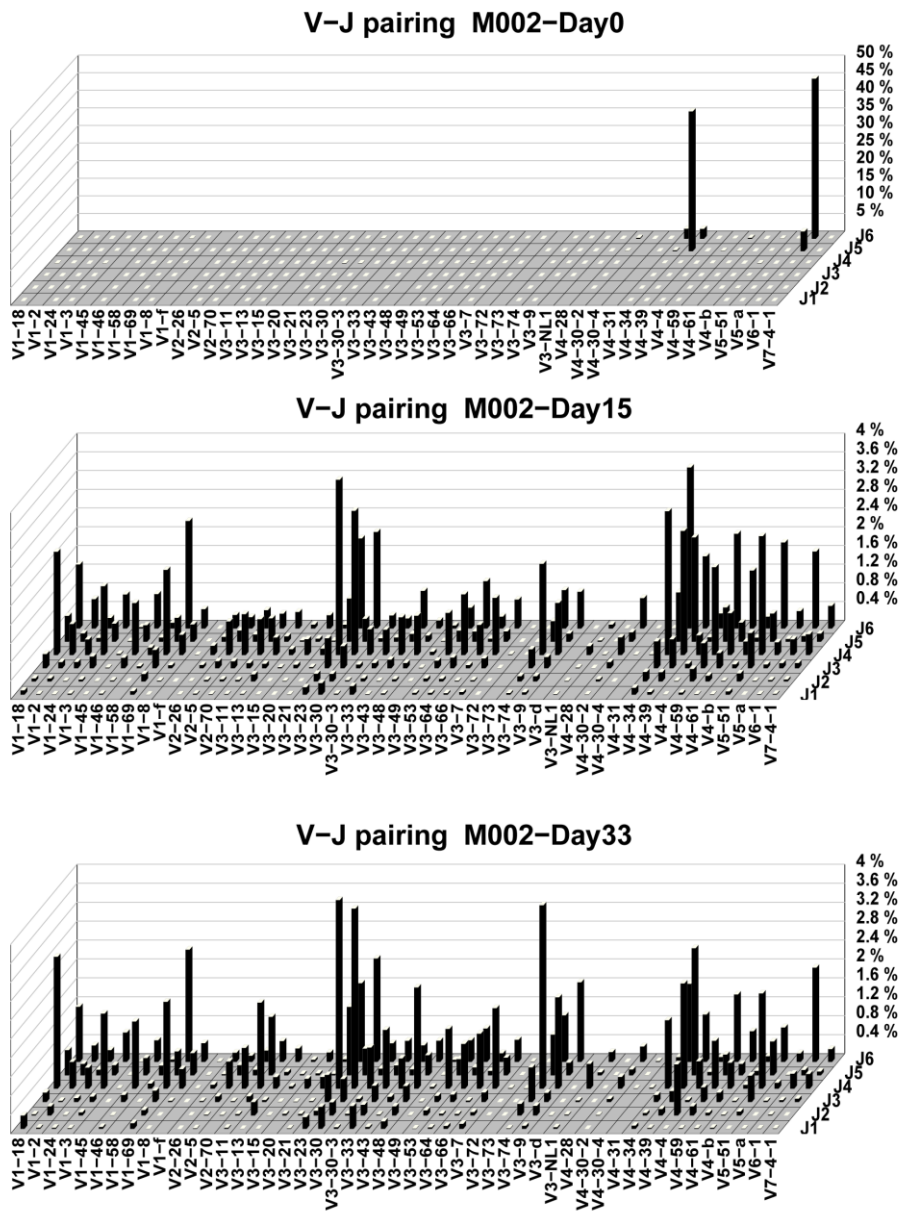

**Figure S6. V-J pairing dynamics for M002. Day 0 for pre-treatment, Day 15 and Day 33 for post-treatment.**

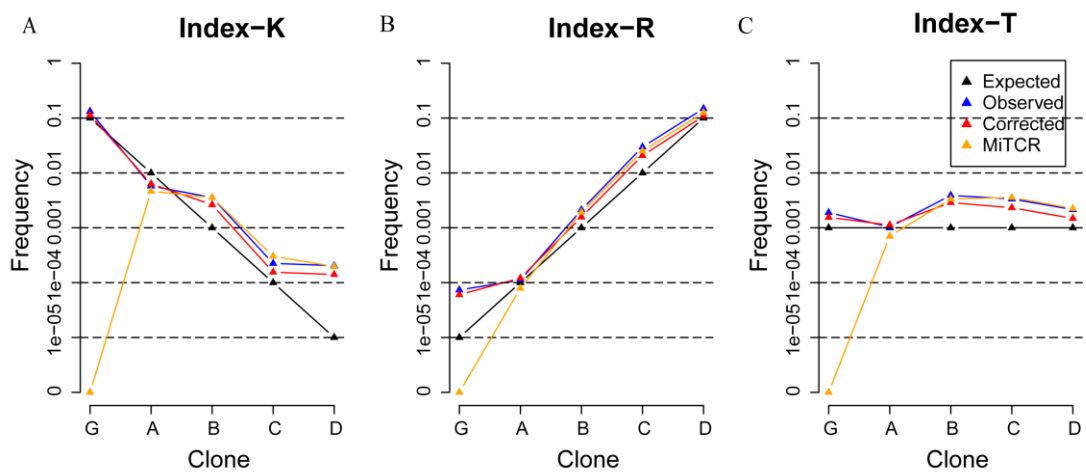

**Figure S7. MiTCR and IMonitor performance in 3 spiked-in samples.**

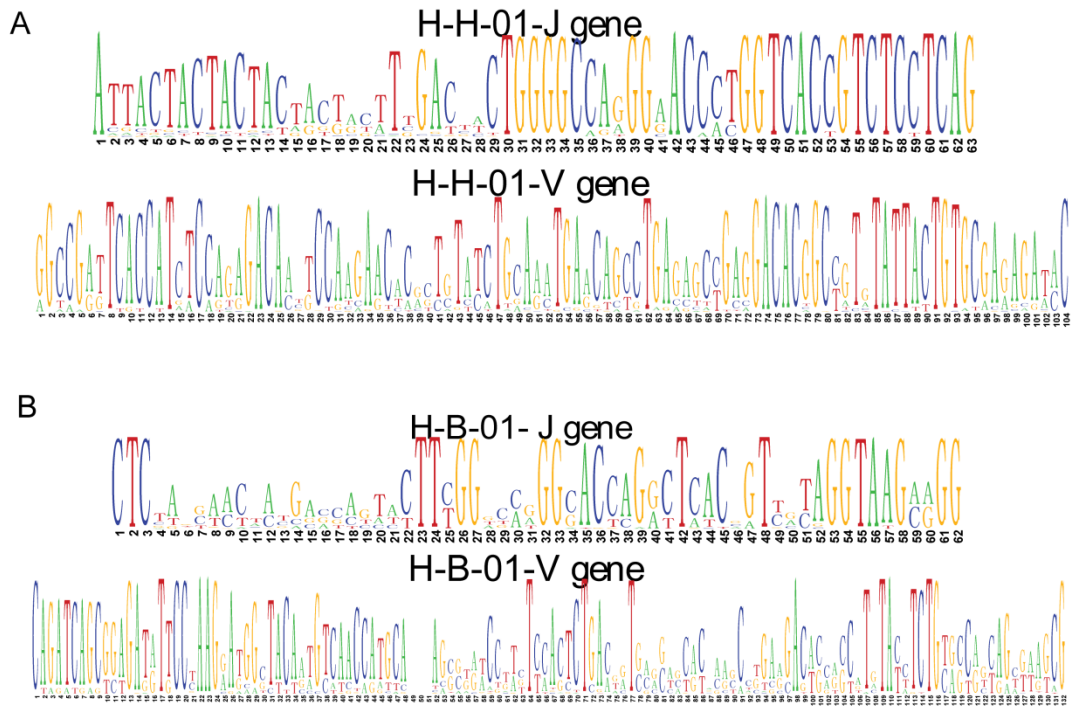

**Figure S8. Nucleotide composition of V/J genes.** (A) H-H-01 sample. (B) H-B-01 sample.
