# Supplementary material
Source: PubMed Central journal article supplement (PMC4596662)
Supplement: supp_115.176735_FigureS2.pdf [file supp_115.176735_FigureS2.pdf]

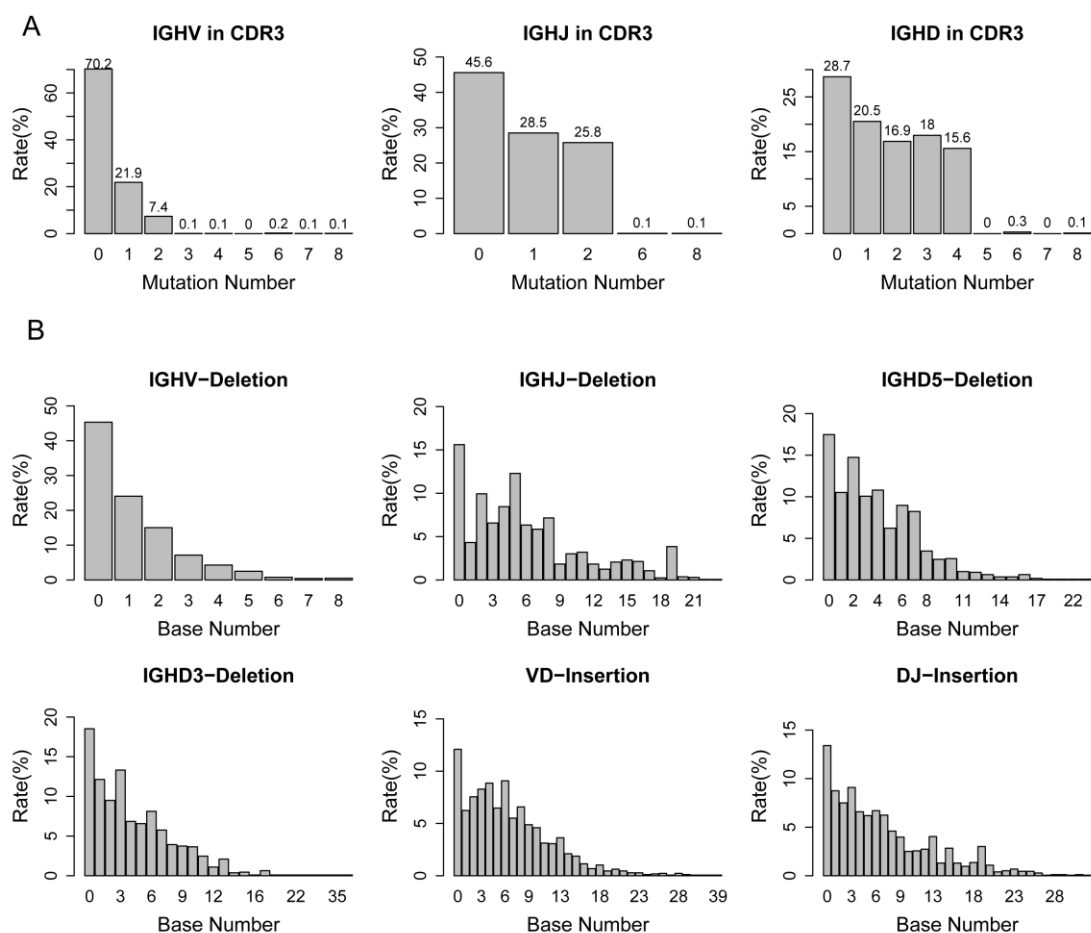

**Figure S2. IGH-VDJ Mutation and deletion/insertion analysis on the public sequences. (A) VDJ mutation number statistics. (B) VDJ deletion/insertion length statistics.** The data sets were obtained from IMGT/LIGM-DB database(<http://www.imgt.org/ligmdb/>), searched by “Homo sapiens”, “rearranged”, ”TRB” or “IGH”, and then selected the sequences annotated by manual(Annot. level==”manual”) and annotated by V,D,J genes. So these sequences have fairly high level of annotation confidence.
