# Supplementary material
Source: PubMed Central journal article supplement (PMC4596662)
Supplement: supp_115.176735_FigureS3.pdf [file supp_115.176735_FigureS3.pdf]

## 1. Sample Basical Statistics

| #Title                  | Seq_num | Rate_of_input(%) | Rate_of_rawdata(%) |
|-------------------------|---------|------------------|--------------------|
| Raw_seq_number(PE=1)    | 8126815 | -                | -                  |
| Clean_data              | 7955514 | 97.89            | 97.89              |
| PE_read_merged          | 7934499 | 99.74            | 97.63              |
| Merged_with_highquality | 7806823 | 98.13            | 96.06              |
| V_alignment             | 7692062 | 98.53            | 94.65              |
| D_alignment             | 3944006 | 50.52            | 48.53              |
| J_alignment             | 7509383 | 96.19            | 92.40              |
| VJ_alignment            | 7419604 | 95.04            | 91.29              |
| CDR3_found_VJ           | 7313503 | 98.57            | 89.99              |
| CDR3_found_byconserve   | -       | -                | -                  |
| PCR_Sequencing_correct  | 6569719 | 89.83            | 80.84              |
| Effective_data          | 6188283 | 94.19            | 76.14              |

-----Note:-----

Clean\_data: filter the Adapter pollution, low quality sequence  
Effective\_data: filter the sequence: 1. cannot find CDR3;  
2. V and J strand conflict; 3. CDR3 less than 0bp;  
4. sequence abundance filter.

## 2. Sample Further Statistics

|                                     |         |           |
|-------------------------------------|---------|-----------|
| in-frame:                           | 5986614 | 96.74     |
| out-of-frame(stop_codon):           | 33909   | 0.55      |
| out-of-frame(CDR3_length):          | 105860  | 1.71      |
| non-function:                       | 61899   | 1.00      |
| V_gene_used:                        | 48      | 100.00    |
| J_gene_used:                        | 13      | 100.00    |
| V-J_pairing:                        | 558     | 89.42     |
| Uniq_number(seq_nt,seq_aa):         | 1152945 | 926184    |
| Uniq_number(cdr3_nt,cdr3_aa):       | 204878  | 182609    |
| Shannon_index(seq,seq_aa):          | 16.23   | 15.74     |
| Shannon_index(cdr3_nt,cdr3_aa):     | 14.47   | 14.25     |
| Shanono_index(V,J,V-J):             | 3.84    | 2.54 6.22 |
| Hyper-mutation(base_rate,seq_rate): | 0.00    | 0.00      |

**Figure S3. Outputs of IMonitor, H-B-01 as an example.** Sample basic statistics show the data procedure, from raw data to effective data, such as paired-end reads merged, V(D)J alignment rate. Sample further statistics, show the multiple statistics based on effective data.
