# Supplementary material
Source: PubMed Central journal article supplement (PMC4596662)
Supplement: supp_115.176735_FigureS5.pdf [file supp_115.176735_FigureS5.pdf]

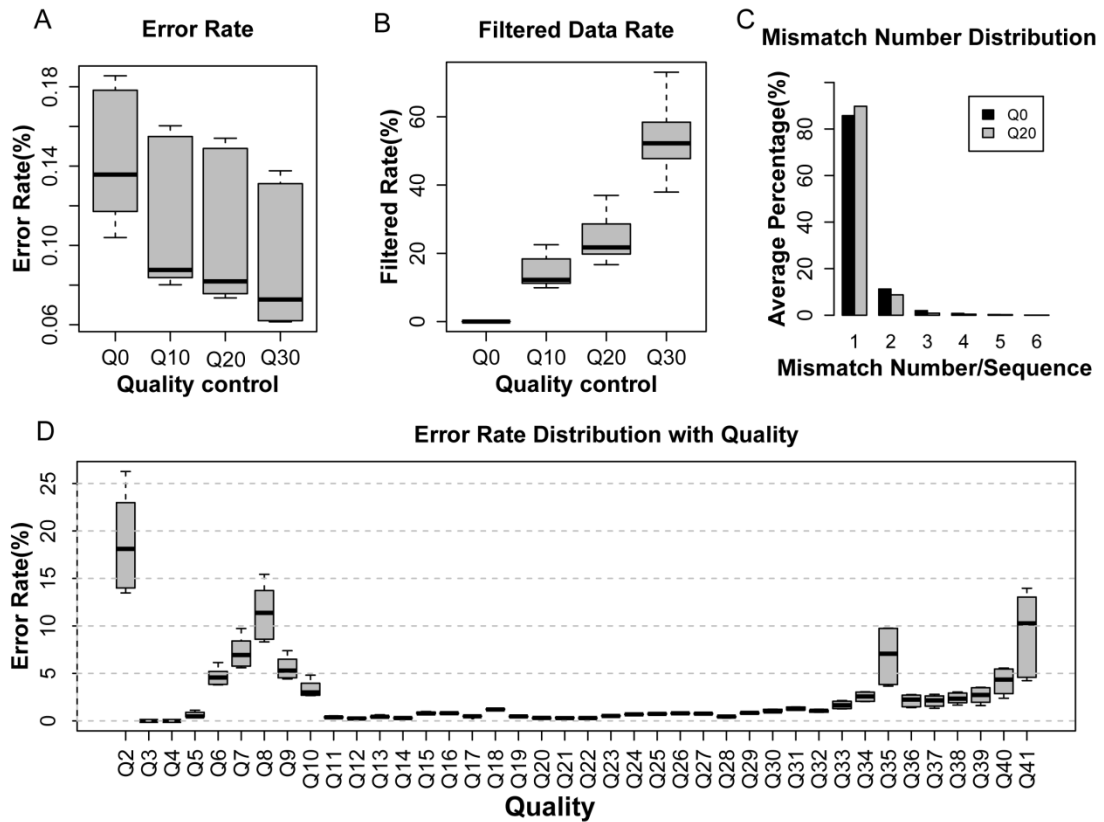

**Figure S5. Error characteristics of 6 plasmid mix samples.** (A) Error base rate after sequence filtering by different minimal quality value. For example, Q20 means filter the sequence with at least one base quality less than Q20. (B) Removed data rate after sequence filtering by different minimal quality. (C) Mismatch number distribution, raw sequences (Q0, no filtration) and sequences after filtering by minimal quality 20(Q20). (D) Error base distribution with base quality. Only unique sequences are considered.
