# Supplementary material
Source: PubMed Central journal article supplement (PMC4596662)
Supplement: supp_115.176735_TableS1.pdf [file supp_115.176735_TableS1.pdf]

**Table S1. Simulated TRB with 0.1%, 0.5% and 2% sequencing error.**

| <b>Mismatch Rate</b> | <b>Hyper-Mutation Rate</b> | <b>Software</b>     | <b>TRBV-Gene(%)</b> | <b>TRBD-Gene(%)</b> | <b>TRBJ-Gene(%)</b> | <b>TRBV-allele(%)</b> | <b>TRBD-allele(%)</b> | <b>TRBJ-allele(%)</b> |
|----------------------|----------------------------|---------------------|---------------------|---------------------|---------------------|-----------------------|-----------------------|-----------------------|
| 0.10%                | 0.00%                      | <b>IMMonitor</b>    | 98.25               | 77.04               | 100.00              | 82.95                 | 72.13                 | 99.98                 |
|                      |                            | <b>HighV-QUEST</b>  | 91.46               | 86.31               | 99.24               | 65.94                 | 81.69                 | 99.23                 |
|                      |                            | <b>IgBLAST</b>      | 97.87               | 80.55               | 99.20               | 72.46                 | 76.33                 | 99.19                 |
|                      |                            | <b>Decombinator</b> | 70.28               | -                   | 80.76               | 29.53                 | -                     | 70.17                 |
| 0.50%                | 0.00%                      | <b>IMMonitor</b>    | 98.18               | 76.90               | 100.00              | 82.34                 | 71.60                 | 99.83                 |
|                      |                            | <b>HighV-QUEST</b>  | 91.44               | 85.77               | 99.24               | 66.04                 | 80.75                 | 99.14                 |
|                      |                            | <b>IgBLAST</b>      | 97.80               | 79.32               | 99.02               | 72.58                 | 74.95                 | 98.92                 |
|                      |                            | <b>Decombinator</b> | 68.33               | -                   | 78.64               | -                     | -                     | -                     |
| 2%                   | 0.00%                      | <b>IMMonitor</b>    | 98.13               | 77.82               | 100.00              | 80.01                 | 70.77                 | 99.42                 |
|                      |                            | <b>HighV-QUEST</b>  | 91.59               | 83.89               | 99.30               | 65.39                 | 77.27                 | 98.96                 |
|                      |                            | <b>IgBLAST</b>      | 97.83               | 75.13               | 98.61               | 71.82                 | 70.07                 | 98.27                 |
|                      |                            | <b>Decombinator</b> | 59.58               | -                   | 68.45               | 24.85                 | -                     | 60.18                 |
