# Supplementary material
Source: PubMed Central journal article supplement (PMC4596662)
Supplement: supp_115.176735_TableS2.pdf [file supp_115.176735_TableS2.pdf]

**Table S2. Simulated IGH with 0.1%, 0.5% and 2% sequencing error and 0.1%**

**hyper-mutation**

| <b>Mismatch Rate</b> | <b>Hyper-Mutation Rate</b> | <b>Software</b>    | <b>IGHV-G ene(%)</b> | <b>IGHD-G ene(%)</b> | <b>IGHJ-G ene(%)</b> | <b>IGHV-al lele(%)</b> | <b>IGHD-al lele(%)</b> | <b>IGHJ-all ele(%)</b> |
|----------------------|----------------------------|--------------------|----------------------|----------------------|----------------------|------------------------|------------------------|------------------------|
| <b>0.10%</b>         | 0.10%                      | <b>IMonitor</b>    | 98.30                | 83.97                | 99.98                | 81.48                  | 81.41                  | 99.88                  |
|                      |                            | <b>HighV-QUEST</b> | 87.97                | 72.90                | 98.60                | 69.38                  | 70.81                  | 97.21                  |
|                      |                            | <b>IgBLAST</b>     | 98.76                | 75.68                | 99.83                | 80.74                  | 73.7                   | 99.73                  |
| <b>0.50%</b>         | 0.10%                      | <b>IMonitor</b>    | 98.19                | 83.86                | 99.98                | 81.3                   | 81.28                  | 99.66                  |
|                      |                            | <b>HighV-QUEST</b> | 87.51                | 72.73                | 98.61                | 68.96                  | 70.66                  | 97.01                  |
|                      |                            | <b>IgBLAST</b>     | 98.63                | 75.47                | 99.83                | 80.63                  | 73.52                  | 99.5                   |
| <b>2%</b>            | 0.10%                      | <b>IMonitor</b>    | 98.02                | 83.79                | 99.96                | 80.46                  | 81.01                  | 98.68                  |
|                      |                            | <b>HighV-QUEST</b> | 87.72                | 72.33                | 98.59                | 68.43                  | 70.04                  | 96.17                  |
|                      |                            | <b>IgBLAST</b>     | 98.52                | 74.61                | 99.79                | 79.63                  | 72.22                  | 98.55                  |
