# Supplementary material
Source: PubMed Central journal article supplement (PMC4596662)
Supplement: supp_115.176735_TableS3.pdf [file supp_115.176735_TableS3.pdf]

**Table S3. Simulated Data with 0.5% sequencing error (TRA/IGK/IGL) and 4% hyper-mutation for IGK/IGL**

| Gene | Mismatch Rate | Hyper-Mutation Rate | Software     | V-Gene(%) | J-Gene(%) | V-allele(%) | J-allele(%) |
|------|---------------|---------------------|--------------|-----------|-----------|-------------|-------------|
| IGK  | 0.50%         | 4.00%               | IMMonitor    | 93.57     | 99.99     | 86.91       | 92.70       |
|      |               |                     | HighV-QUST   | 73.13     | 99.97     | 64.94       | 93.19       |
|      |               |                     | IgBLAST      | 91.53     | 100.00    | 85.46       | 92.94       |
| IGL  | 0.50%         | 4.00%               | IMMonitor    | 100.00    | 99.57     | 77.24       | 98.79       |
|      |               |                     | HighV-QUST   | 98.82     | 97.54     | 76.85       | 97.26       |
|      |               |                     | IgBLAST      | 100.00    | 99.67     | 78.25       | 99.53       |
| TRA  | 0.50%         | 0.00%               | IMMonitor    | 98.35     | 100.00    | 86.75       | 99.39       |
|      |               |                     | HighV-QUST   | 100.00    | 94.12     | 83.31       | 93.85       |
|      |               |                     | IgBLAST      | 100.00    | 100.00    | 85.32       | 99.93       |
|      |               |                     | Decombinator | 68.36     | 72.83     | -           | -           |
