# Supplementary material
Source: PubMed Central journal article supplement (PMC4596662)
Supplement: supp_115.176735_TableS4.pdf [file supp_115.176735_TableS4.pdf]

**Table S4. Plasmid mixing pattern**

| Plasmid No. | V gene          | J gene  | Plasmid mix 1-1* | Plasmid mix 1-2* | Plasmid mix 2-1* | Plasmid mix 2-2* | Plasmid mix 3-1* | Plasmid mix 3-2* |
|-------------|-----------------|---------|------------------|------------------|------------------|------------------|------------------|------------------|
| C-01        | TRBV10-1        | TRBJ2-7 | 2000             | 2000             | 10               | 10               | 100000           | 100000           |
| C-02        | TRBV10-2/3      | TRBJ2-7 | 2000             | 2000             | 1000             | 1000             | 1000             | 1000             |
| C-03        | TRBV11-1/2/3    | TRBJ1-3 | 2000             | 2000             | 10               | 10               | 100000           | 100000           |
| C-04        | TRBV11-1/2/3    | TRBJ1-5 | 2000             | 2000             | 100              | 100              | 10000            | 10000            |
| C-05        | TRBV12-3/4      | TRBJ2-1 | 2000             | 2000             | 10000            | 10000            | 100              | 100              |
| C-06        | TRBV12-5        | TRBJ2-1 | 2000             | 2000             | 100              | 100              | 10000            | 10000            |
| C-07        | TRBV13          | TRBJ1-1 | 2000             | 2000             | 10000            | 10000            | 100              | 100              |
| C-08        | TRBV14          | TRBJ2-7 | 2000             | 2000             | 100000           | 100000           | 10               | 10               |
| C-09        | TRBV15          | TRBJ1-6 | 2000             | 2000             | 1000             | 1000             | 1000             | 1000             |
| C-10        | TRBV15          | TRBJ2-4 | 2000             | 2000             | 100000           | 100000           | 10               | 10               |
| C-11        | TRBV16          | TRBJ1-1 | 2000             | 2000             | 100000           | 100000           | 10               | 10               |
| C-12        | TRBV19          | TRBJ1-6 | 2000             | 2000             | 100              | 100              | 10000            | 10000            |
| C-13        | TRBV20-1        | TRBJ1-4 | 2000             | 2000             | 100000           | 100000           | 10               | 10               |
| C-14        | TRBV20-1        | TRBJ1-5 | 2000             | 2000             | 10               | 10               | 100000           | 100000           |
| C-15        | TRBV20-1        | TRBJ2-2 | 2000             | 2000             | 1000             | 1000             | 1000             | 1000             |
| C-16        | TRBV24-1        | TRBJ1-2 | 2000             | 2000             | 100              | 100              | 10000            | 10000            |
| C-17        | TRBV25          | TRBJ2-5 | 2000             | 2000             | 10000            | 10000            | 100              | 100              |
| C-18        | TRBV27/28       | TRBJ2-4 | 2000             | 2000             | 100000           | 100000           | 10               | 10               |
| C-19        | TRBV29-1        | TRBJ2-3 | 2000             | 2000             | 100000           | 100000           | 10               | 10               |
| C-20        | TRBV2           | TRBJ2-6 | 2000             | 2000             | 10               | 10               | 100000           | 100000           |
| C-21        | TRBV30          | TRBJ1-1 | 2000             | 2000             | 1000             | 1000             | 1000             | 1000             |
| C-22        | TRBV3-1         | TRBJ1-2 | 2000             | 2000             | 10000            | 10000            | 100              | 100              |
| C-23        | TRBV4-1/2/3     | TRBJ2-7 | 2000             | 2000             | 10000            | 10000            | 100              | 100              |
| C-24        | TRBV5-1         | TRBJ2-1 | 2000             | 2000             | 100000           | 100000           | 10               | 10               |
| C-25        | TRBV5-4/5/6/8   | TRBJ2-3 | 2000             | 2000             | 10000            | 10000            | 100              | 100              |
| C-26        | TRBV6-1/2/3/5/8 | TRBJ2-1 | 2000             | 2000             | 10000            | 10000            | 100              | 100              |
| C-27        | TRBV6-4         | TRBJ2-5 | 2000             | 2000             | 1000             | 1000             | 1000             | 1000             |
| C-28        | TRBV6-6         | TRBJ1-6 | 2000             | 2000             | 10               | 10               | 100000           | 100000           |
| C-29        | TRBV6-9         | TRBJ1-3 | 2000             | 2000             | 1000             | 1000             | 1000             | 1000             |
| C-30        | TRBV7-2/4/6/7/8 | TRBJ2-6 | 2000             | 2000             | 10               | 10               | 100000           | 100000           |
| C-31        | TRBV7-3         | TRBJ2-7 | 2000             | 2000             | 100              | 100              | 10000            | 10000            |
| C-32        | TRBV7-9         | TRBJ1-4 | 2000             | 2000             | 1000             | 1000             | 1000             | 1000             |
| C-33        | TRBV9           | TRBJ1-2 | 2000             | 2000             | 100              | 100              | 10000            | 10000            |

Note: \* the clone ratio in the sample.
