# Supplementary material
Source: PubMed Central journal article supplement (PMC4596662)
Supplement: supp_115.176735_TableS5.pdf [file supp_115.176735_TableS5.pdf]

**Table S5. Data process for PCR and sequencing error statistics.**

| Sample          | Sum Sequence | High Quality Sequence(%) | Filter Sequence(%) | Low Quality Corrected(%) | PCR Error Corrected(%) | Effective Data | Before Correction |                   | After Correction |                   |
|-----------------|--------------|--------------------------|--------------------|--------------------------|------------------------|----------------|-------------------|-------------------|------------------|-------------------|
|                 |              |                          |                    |                          |                        |                | Base Error(%)     | Sequence Error(%) | Base Error(%)    | Sequence Error(%) |
| <b>index-1</b>  | 4,273,571    | 78.50                    | 9.28               | 12.21                    | 8.36                   | 3,876,775      | 0.098             | 7.304             | 0.016            | 1.152             |
| <b>index-2</b>  | 4,217,557    | 78.59                    | 9.77               | 11.64                    | 9.10                   | 3,805,551      | 0.111             | 8.628             | 0.022            | 1.564             |
| <b>index-3</b>  | 3,603,556    | 70.16                    | 16.25              | 13.59                    | 4.44                   | 3,018,100      | 0.070             | 5.218             | 0.009            | 0.590             |
| <b>index-10</b> | 5,078,119    | 81.28                    | 8.80               | 9.92                     | 4.70                   | 4,631,376      | 0.058             | 4.359             | 0.009            | 0.569             |
| <b>index-11</b> | 2,785,059    | 64.59                    | 18.61              | 16.80                    | 5.32                   | 2,266,836      | 0.081             | 6.484             | 0.010            | 0.779             |
| <b>index-12</b> | 3,335,881    | 76.15                    | 10.87              | 12.98                    | 6.04                   | 2,973,382      | 0.072             | 5.885             | 0.010            | 0.816             |
