# Supplementary material
Source: PubMed Central journal article supplement (PMC4596662)
Supplement: supp_115.176735_TableS6.pdf [file supp_115.176735_TableS6.pdf]

**Table S6. Samples information**

| <b>Sample</b> | <b>species</b> | <b>Gene</b> | <b>Library</b> | <b>Experimental method</b> | <b>Sequencer</b> | <b>Type</b> | <b>Amount</b> |
|---------------|----------------|-------------|----------------|----------------------------|------------------|-------------|---------------|
| <b>H-B-01</b> | Human          | TRB         | cDNA           | MPCR                       | Hiseq2500        | PE100       | 1ug           |
| <b>H-H-01</b> | Human          | IGH         | DNA            | MPCR                       | Hiseq2000        | PE100       | 3ug           |
| <b>M001</b>   | Human          | IGH         | DNA            | MPCR                       | Hiseq2500        | PE150       | 1.2ug         |
| <b>M002</b>   | Human          | IGH         | DNA            | MPCR                       | Hiseq2500        | PE150       | 1.2ug         |
