# Supplementary material
Source: PubMed Central journal article supplement (PMC4596662)
Supplement: supp_115.176735_TableS7.pdf [file supp_115.176735_TableS7.pdf]

**Table S7. Experimental design for five CD4+ T cell clones in the three spiked in mix.**

| Clone | TCRB V | TCRB J  | CDR3            | Mix 1   | Mix 2 | Mix 3   |
|-------|--------|---------|-----------------|---------|-------|---------|
| G     | VB8    | TRBJ1-1 | CASSLGGQGVG     | 100,000 | 1000  | 10      |
| A     | VB5.1  | TRBJ2-5 | CASSPGIAELKETQY | 10,000  | 1000  | 100     |
| B     | VB6.7  | TRBJ2-7 | CASHTGFVSYEQY   | 1000    | 1000  | 1000    |
| C     | VB4    | TRBJ1-4 | CSVGTGDNEKLF    | 100     | 1000  | 10,000  |
| D     | VB4    | TRBJ1-4 | CSVGQGDNEKLF    | 10      | 1000  | 100,000 |
