# Supplementary material
Source: PubMed Central journal article supplement (PMC4596662)
Supplement: supp_115.176735_TableS8.pdf [file supp_115.176735_TableS8.pdf]

**Table S8. Performance of IMonitor and other tools on the simulated dataset.**

|                                     | <b>Peak Memory(MB)</b> | <b>Run Time</b> |
|-------------------------------------|------------------------|-----------------|
| Data set of TRB( $10^5$ sequences)  |                        |                 |
| <b>IMonitor</b> <sup>a</sup>        | 325.88M                | 12m52s          |
| <b>IgBLAST</b> <sup>b</sup>         | 327.95M                | 27m46s          |
| <b>Decombinator</b> <sup>c</sup>    | 209.00M                | 1m23s           |
| <b>HighV-QUST</b> <sup>d</sup>      | -                      | -               |
| Data set of IGH ( $10^5$ sequences) |                        |                 |
| <b>IMonitor</b> <sup>a</sup>        | 226.22M                | 21m96s          |
| <b>IgBLAST</b> <sup>b</sup>         | 196.22M                | 92m30s          |
| <b>HighV-QUST</b> <sup>d</sup>      | -                      | -               |

Note: <sup>a</sup>, run with 1cpu and blast (-a 1); <sup>b</sup>, run with 1cpu and iglast (-num\_threads 1);

<sup>c</sup>, run with command prompt; <sup>d</sup>, run online, send the results to user after 1-2weeks
