# Supplementary material
Source: PubMed Central journal article supplement (PMC4596662)
Supplement: supp_115.176735_TableS9.pdf [file supp_115.176735_TableS9.pdf]

**Table S9. TRB and IGH V/J primers**

| IGH V/J Primers |                            | TRB V Primers    |                            |
|-----------------|----------------------------|------------------|----------------------------|
| IGHV1-18        | AGAGTCACCATGACCACAGAC      | TRBV2            | ATTTCACTCTGAAGATCCGGTCCAC  |
| IGHV1-2/1-46    | AGAGTCACCAKKACCAGGGAC      | TRBV3-1          | AAACAGTTCCAAATCGMTTCTCAC   |
| IGHV1-24        | AGAGTCACCATGACCGAGGAC      | TRBV4-1/2/3      | CAAGTCGCTTCTCACCTGAATG     |
| IGHV1-3/1-45    | AGAGTCACCATTACYAGGGAC      | TRBV5-1          | GCCAGTTCTCTAACTCTCGCTCT    |
| IGHV1-69/1-f    | AGAGTCACGATWACCRCGGAC      | TRBV5-4/5/6/8    | TCAGGTCGCCAGTTCCTAAATAT    |
| IGHV1-8         | AGAGTCACCATGACCAGGAAC      | TRBV6-4.1        | CACGTTGGCGTCTGCTGTACCCT    |
| IGH2-70/26/5    | ACCAGGCTCACCATYWCCAAGG     | TRBV6-8/5/1.2    | CAGGCTGGTGTCGGCTGCTCCCT    |
| IGHV3           | GGCCGATTACCATCTCMAG        | TRBV6-9/7/1.1/6  | CAGGCTGGAGTCAGCTGCTCCCT    |
| IGH4            | CGAGTCACCATRRCMGTAGAC      | TRBV6-4.2        | AGTCGCTTGTGTACCCTCTCAG     |
| IGHV5-51        | CAGCCGACAAGTCCATCAGC       | TRBV6-2/3        | GGGGTTGGAGTCGGCTGCTCCCT    |
| IGHV6-1         | AGTCGAATAACCATCAACCCAG     | TRBV7-2/4/6/7/8  | GGGATCCGCTCTCACTCTGAMGAT   |
| IGHV7           | GACGGTTTGTCTTCTCCTTG       | TRBV7-3          | GGGATCCGCTCTCACTCTGAAGAT   |
| IGHJ            | CTGAGGAGACGGTGACCRKKG      | TRBV7-9          | GGGATCTTCTCCACCTTGGAGAT    |
|                 |                            | TRBV9            | CCTGACTTGCCTCTGAACTAAACCT  |
|                 |                            | TRBV10-1         | CCTCACTCTGGAGTCTGCTGCC     |
|                 |                            | TRBV10-2/3       | CCTCACTCTGGAGTCMGCTACC     |
|                 |                            | TRBV11-1/2/3     | GCAGAGAGGCTCAAAGGAGTAGACT  |
|                 |                            | TRBV12-3.2/5.2   | GAAGGTGCAGCCTGCAGAACCCAG   |
|                 |                            | TRBV12-3.1/4/5.1 | GAAGATCCAGCCCTCAGAACCCAG   |
| TRB J Primers   |                            |                  |                            |
| TRBJ1.1         | CTTACCTACAACCTGTGAGTCTGGTG | TRBV13           | TCGATTCTCAGCTCAACAGTTC     |
| TRBJ1.2         | CTTACCTACAACGGTTAACCTGGTC  | TRBV14           | GGAGGGACGTATTCTACTCTGAAGG  |
| TRBJ1.3         | CTTACCTACAACAGTGAGCCAACCTT | TRBV15           | TTCTTGACATCCGCTCACCAGG     |
| TRBJ1.4         | AAGACAGAGAGCTGGGTTCCACT    | TRBV16           | CTGTAGCCTTGAGATCCAGGCTACGA |
| TRBJ1.5         | CTTACCTAGGATGGAGAGTCGAGTC  | TRBV18           | TAGATGAGTCAGGAATGCCAAAG    |
| TRBJ1.6         | CATACCTGTCACAGTGAGCCTG     | TRBV19           | TCCTTCTCTCACTGTGACATCGG    |
| TRBJ2.1         | CCTTCTTACCTAGCACGGTGA      | TRBV20-1         | AACCATGCAAGCCTGACCTT       |
| TRBJ2.2         | CTTACCCAGTACGGTCAGCCT      | TRBV24-1         | CTCCCTGTCCCTAGAGTCTGCCAT   |
| TRBJ2.3         | CCGCTTACCGAGCACTGTCAG      | TRBV25-1         | GCCCTCACATACCTCTCAGTACCTC  |
| TRBJ2.4         | AGCACTGAGAGCCGGGTCC        | TRBV27-1         | GATCCTGGAGTCGCCCAGC        |
| TRBJ2.5         | CGAGCACCAGGAGCCGCGT        | TRBV28           | ATTCTGGAGTCCGCCAGC         |
| TRBJ2.6         | CTCGCCCAGCACGGTCAGCCT      | TRBV29-1         | AACTCTGACTGTGAGCAACATGAG   |
| TRBJ2.7         | CTTACCTGTGACCGTGAGCCTG     | TRBV30-F5        | CAGATCAGCTCTGAGGTGCCCA     |
