# Supplementary material
Source: PubMed Central journal article supplement (PMC4596662)

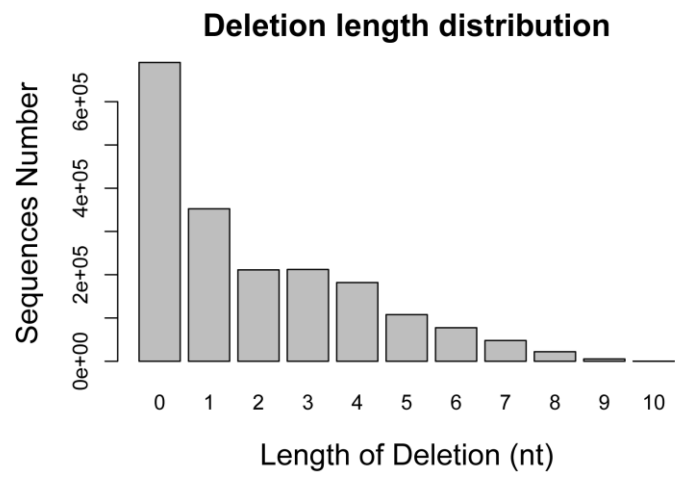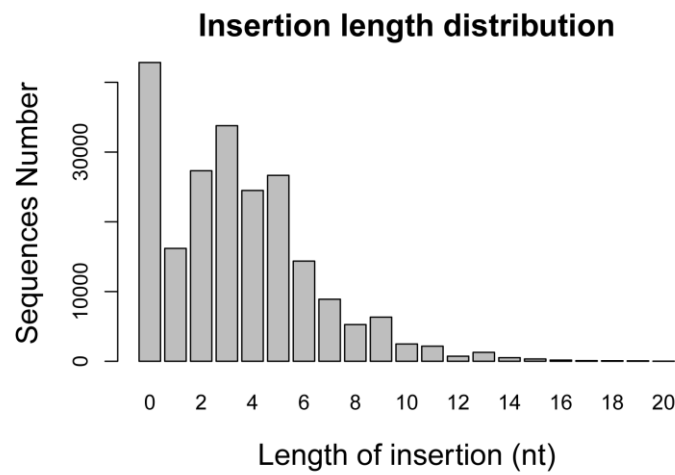

**Figure S1. Insertion and deletion length distribution for simulated data.**

Supplement: supp_115.176735_FigureS1.pdf [file supp_115.176735_FigureS1.pdf]

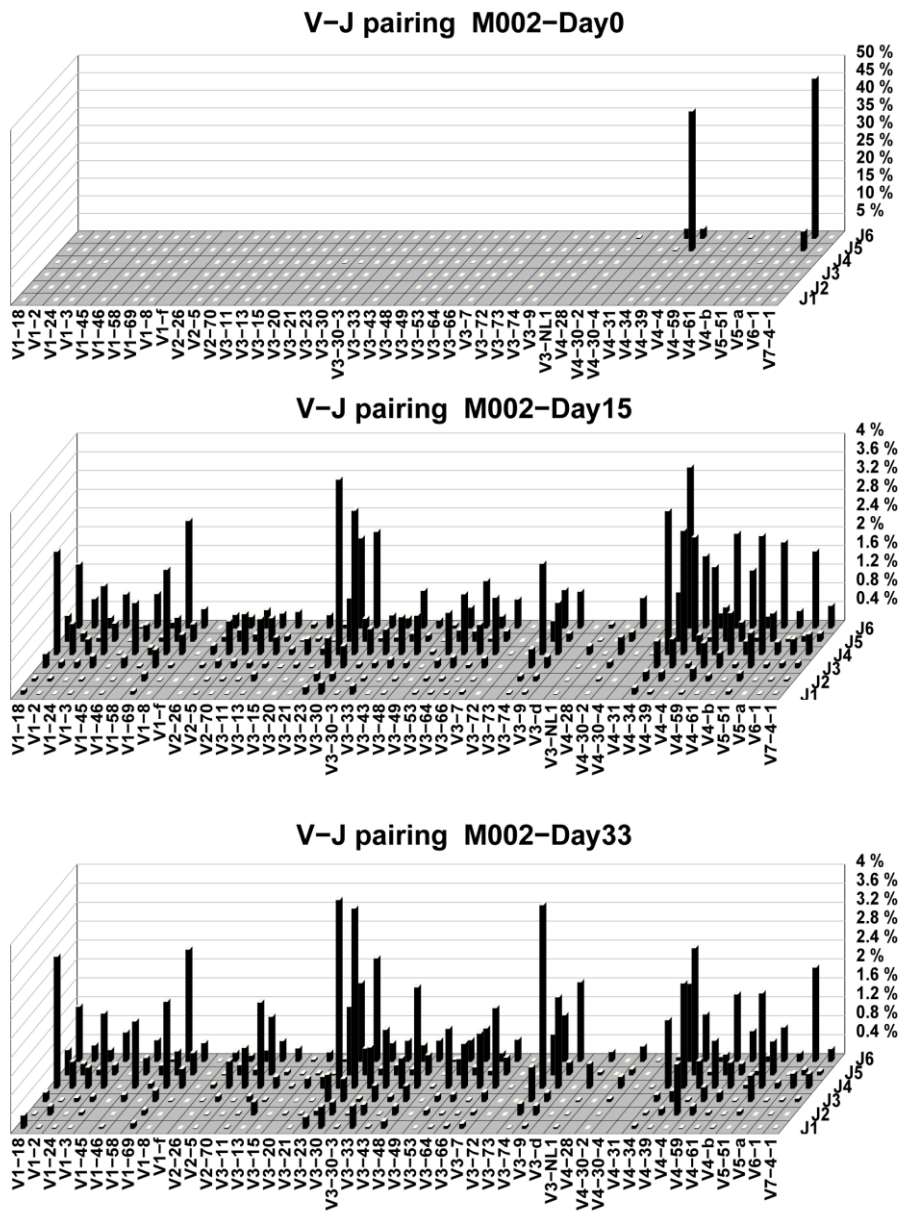

**Figure S6. V-J pairing dynamics for M002.** Day 0 for pre-treatment, Day 15 and Day 33 for post-treatment.

Supplement: supp_115.176735_FigureS6.pdf [file supp_115.176735_FigureS6.pdf]

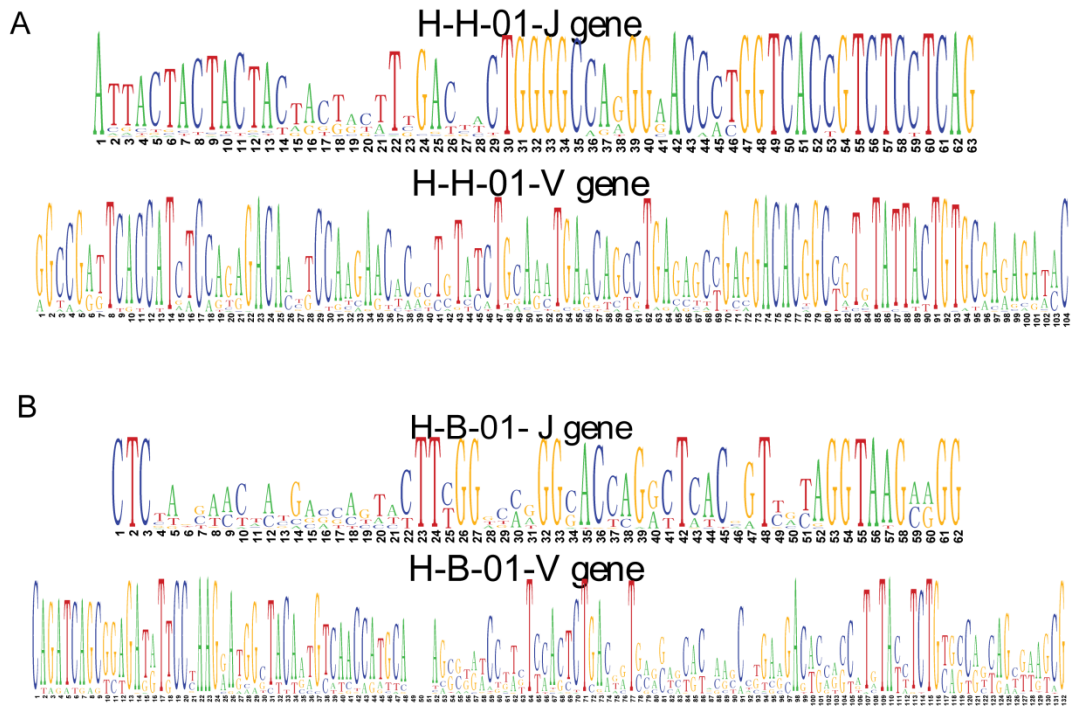

**Figure S8. Nucleotide composition of V/J genes.** (A) H-H-01 sample. (B) H-B-01 sample.

Supplement: supp_115.176735_FigureS8.pdf [file supp_115.176735_FigureS8.pdf]
